# Supplementary material for: Uncovering the computational mechanisms underlying many-alternative choice
Source: eLife. 2021 Apr 6;10:e57012. doi: 10.7554/eLife.57012 (PMC8025657; doi:10.7554/eLife.57012)
Supplement: Supplementary file 2. — The independent evidence accumulation model has four parameters, determining its additive (ζ) and multiplicative (γ) gaze bias effects and its general accumulation speed (v) and noise (σ). [file elife-57012-supp2.docx]

| Model | Choice  set size |  |  |  |  |
| --- | --- | --- | --- | --- | --- |
| *IAM+* | *9* | 0.013 | 0.23 | 1.8e-4 | 0.010 |
| *IAM+* | *16* | 0.005 | 0.20 | 1.7e-4 | 0.011 |
| *IAM+* | *25* | 0.016 | 0.32 | 1.6e-4 | 0.011 |
| *IAM+* | *36* | 0.023 | 0.31 | 1.8e-4 | 0.013 |
| *IAM* | *9* |  |  | 1.9e-5 | 0.014 |
| *IAM* | *16* |  |  | 1.1e-5 | 0.016 |
| *IAM* | *25* |  |  | 1.1e-5 | 0.016 |
| *IAM* | *36* |  |  | 9.0e-6 | 0.019 |

**Supplementary materials 6.** Mean parameter estimates of the independent evidence accumulation model with active (IAM+) and passive (IAM) account of gaze in the decision process for each choice set size. The independent evidence accumulation model has four parameters, determining its additive () and multiplicative () gaze bias effects and its general accumulation speed () and noise ().
